# Supplementary material for: Investigation of Laser Induced Graphene (LIG) on a Flexible Substrate and Its Functionalization by Metal Doping for Gas-Sensing Applications
Source: Preprints.org preprint supplement (doi:10.20944/preprints202401.0424.v1), 2024-01-05
Supplement: Supplementary file 1 [file supplementary]

Supporting Information for

Investigation of Laser Induced Graphene (LIG) on a Flexible Substrate and its Functionalization with Metal-doping for Gas Sensing Application

Dongwook kwaka, Hyojin Kima, Seung Hun Jangb, Byoung Gak Kima, Donghwi Choa, Hyunju Changb, and Jeong-O Leea,*

*a Advanced Materials Division, Korea Research Institute of Chemical Technology, 141 Gajeongro, Yuseong-gu, Daejeon 34114, Republic of Korea*

*b Data Research Center, Korea Research Institute of Chemical Technology, 141 Gajeongro, Yuseong-gu, Daejeon 34114, Republic of Korea*

**List of Figures**

**Figure S1.** Comparison of the responses of the P-LIG device to 1000 ppm NO2 while varying temperature from 50℃ to 150℃.

**Figure S2.** (a,b) Cross-sectional SEM images of the P-LIG, (c,d) cross-sectional SEM and EDS images of the 4-nm-thick Au-doped LIG, and (e-g) EDS mapping images of the 2-nm-, 4-nm-, and 8-nm-thick Au-doped LIGs.

**Figure S3.** High resolution XPS spectra of Ag, Al, Au, Cu, In, and Pd metal dopants.

**Figure S4.** Electrical resistance variance of the P-LIG device at temperatures from RT to 150℃.

**Figure S5.** Comparison plot of gas responses of the P-LIG device to different concentrations of NO2 and NH3.

**Figure S6.** Gas responses of the P-LIG device to different concentrations of (a) NO2 and (b) NH3.

**Figure S7.** Gas response plots of the P- and M-LIG devices to 1000 ppm of NO2 over three on/off cycles.

**Figure S8.** Gas response plots of the P- and M-LIG devices to 1000 ppm of NH3 over three on/off cycles.

**Table S1.** XPS quantification results for the P- and M-LIG devices.

**
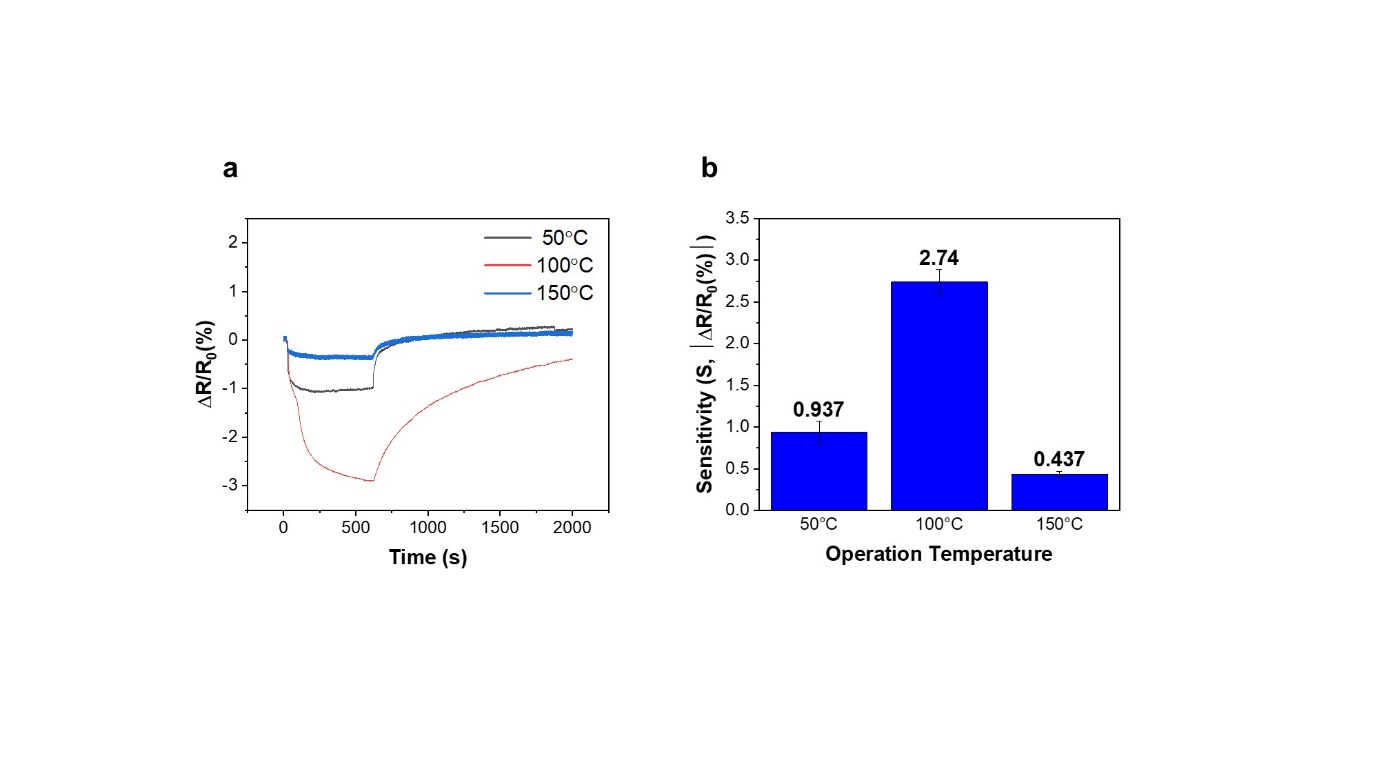
**

**Figure S1.** Comparison of the responses of the P-LIG device to 1000 ppm NO2 while varying temperature from 50℃ to 150℃.

**
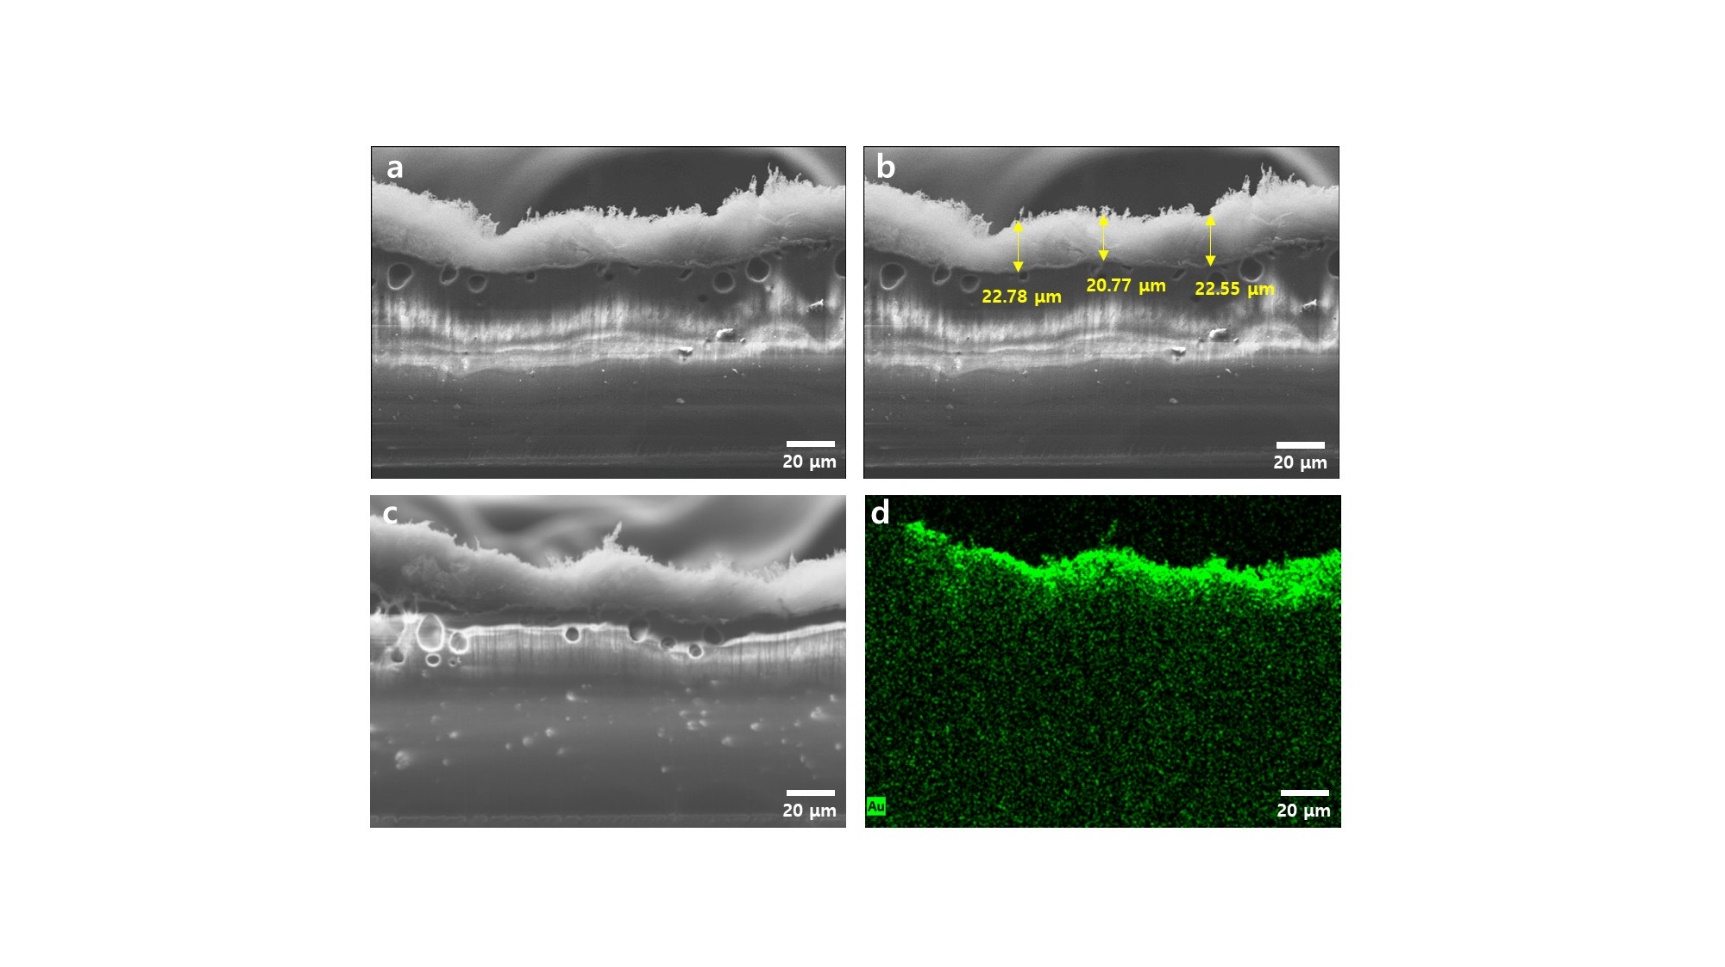
**

**
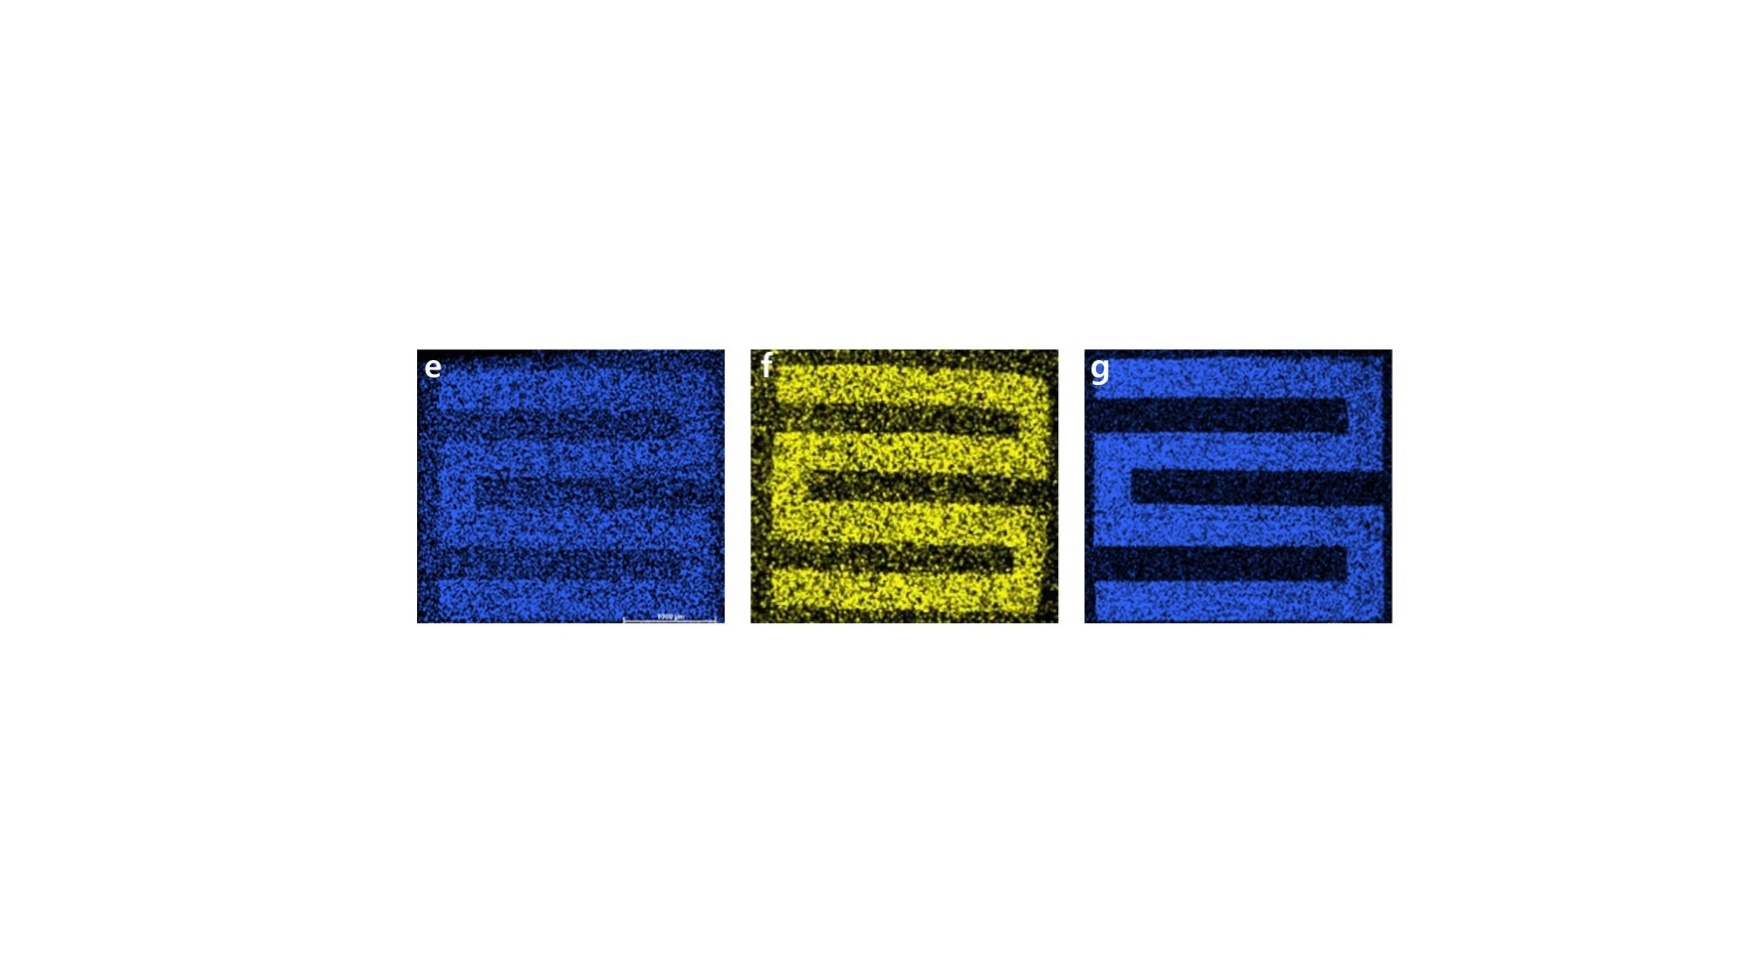
**

**Figure S2.** (a,b) Cross-sectional SEM images of the P-LIG, (c,d) cross-sectional SEM and EDS images of the 4-nm-thick Au-doped LIG, and (e-g) EDS mapping images of the 2-nm-, 4-nm-, and 8-nm-thick Au-doped LIGs.

**
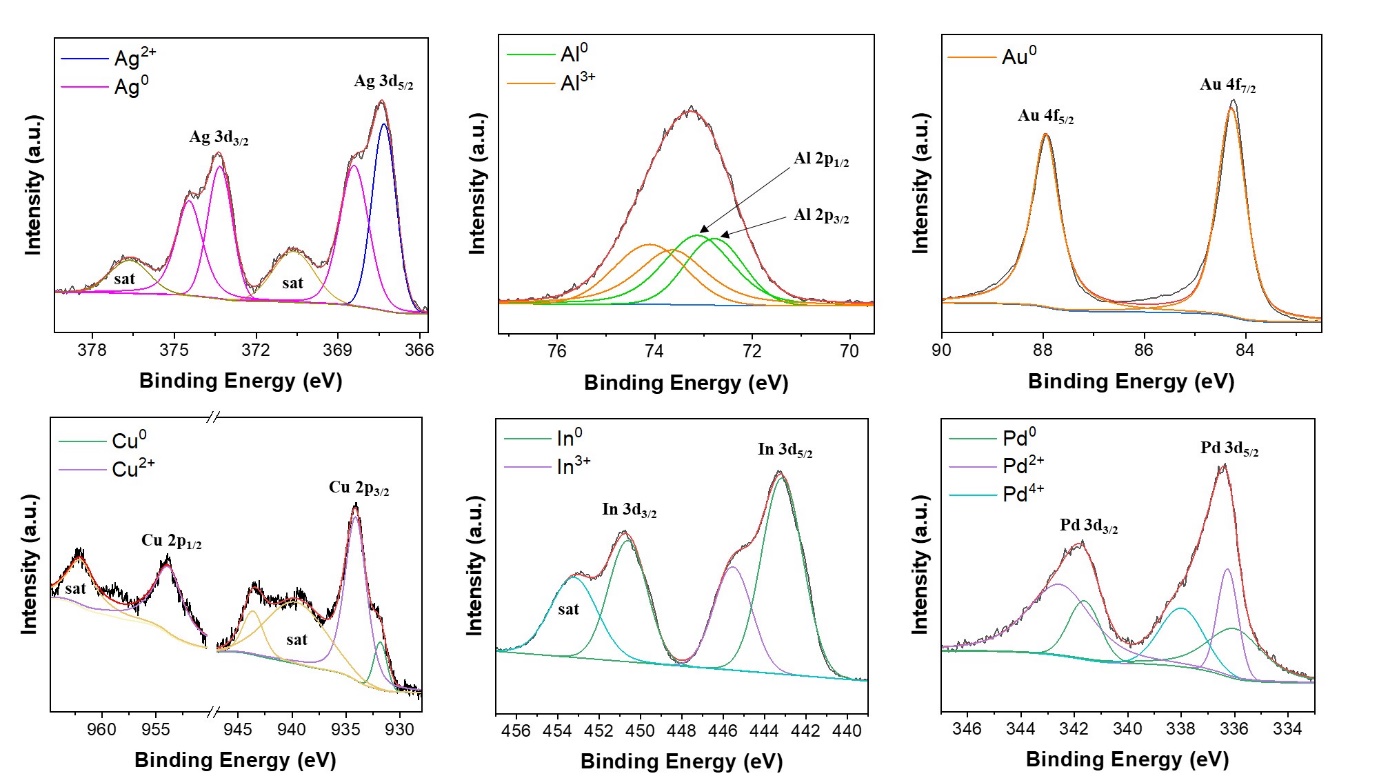
**

**Figure S3.** High resolution XPS spectra of Ag, Al, Au, Cu, In, and Pd metal dopants.

**
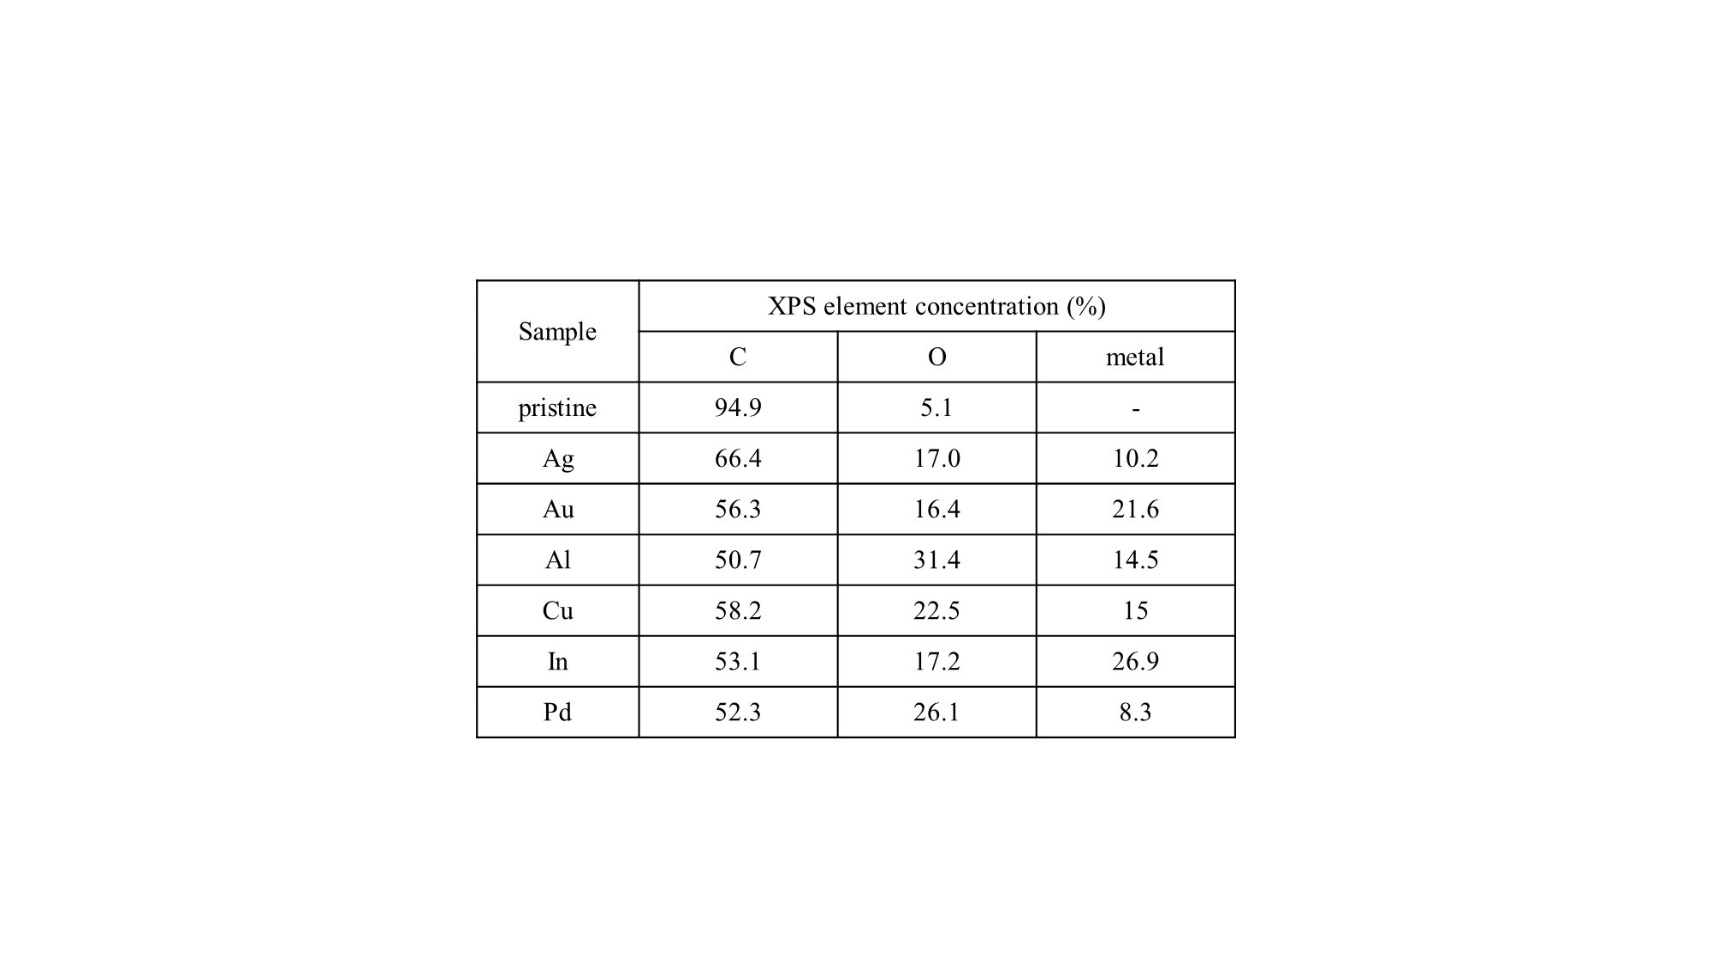
**

**Table S1.** XPS quantification results for the P- and M-LIG devices.

**
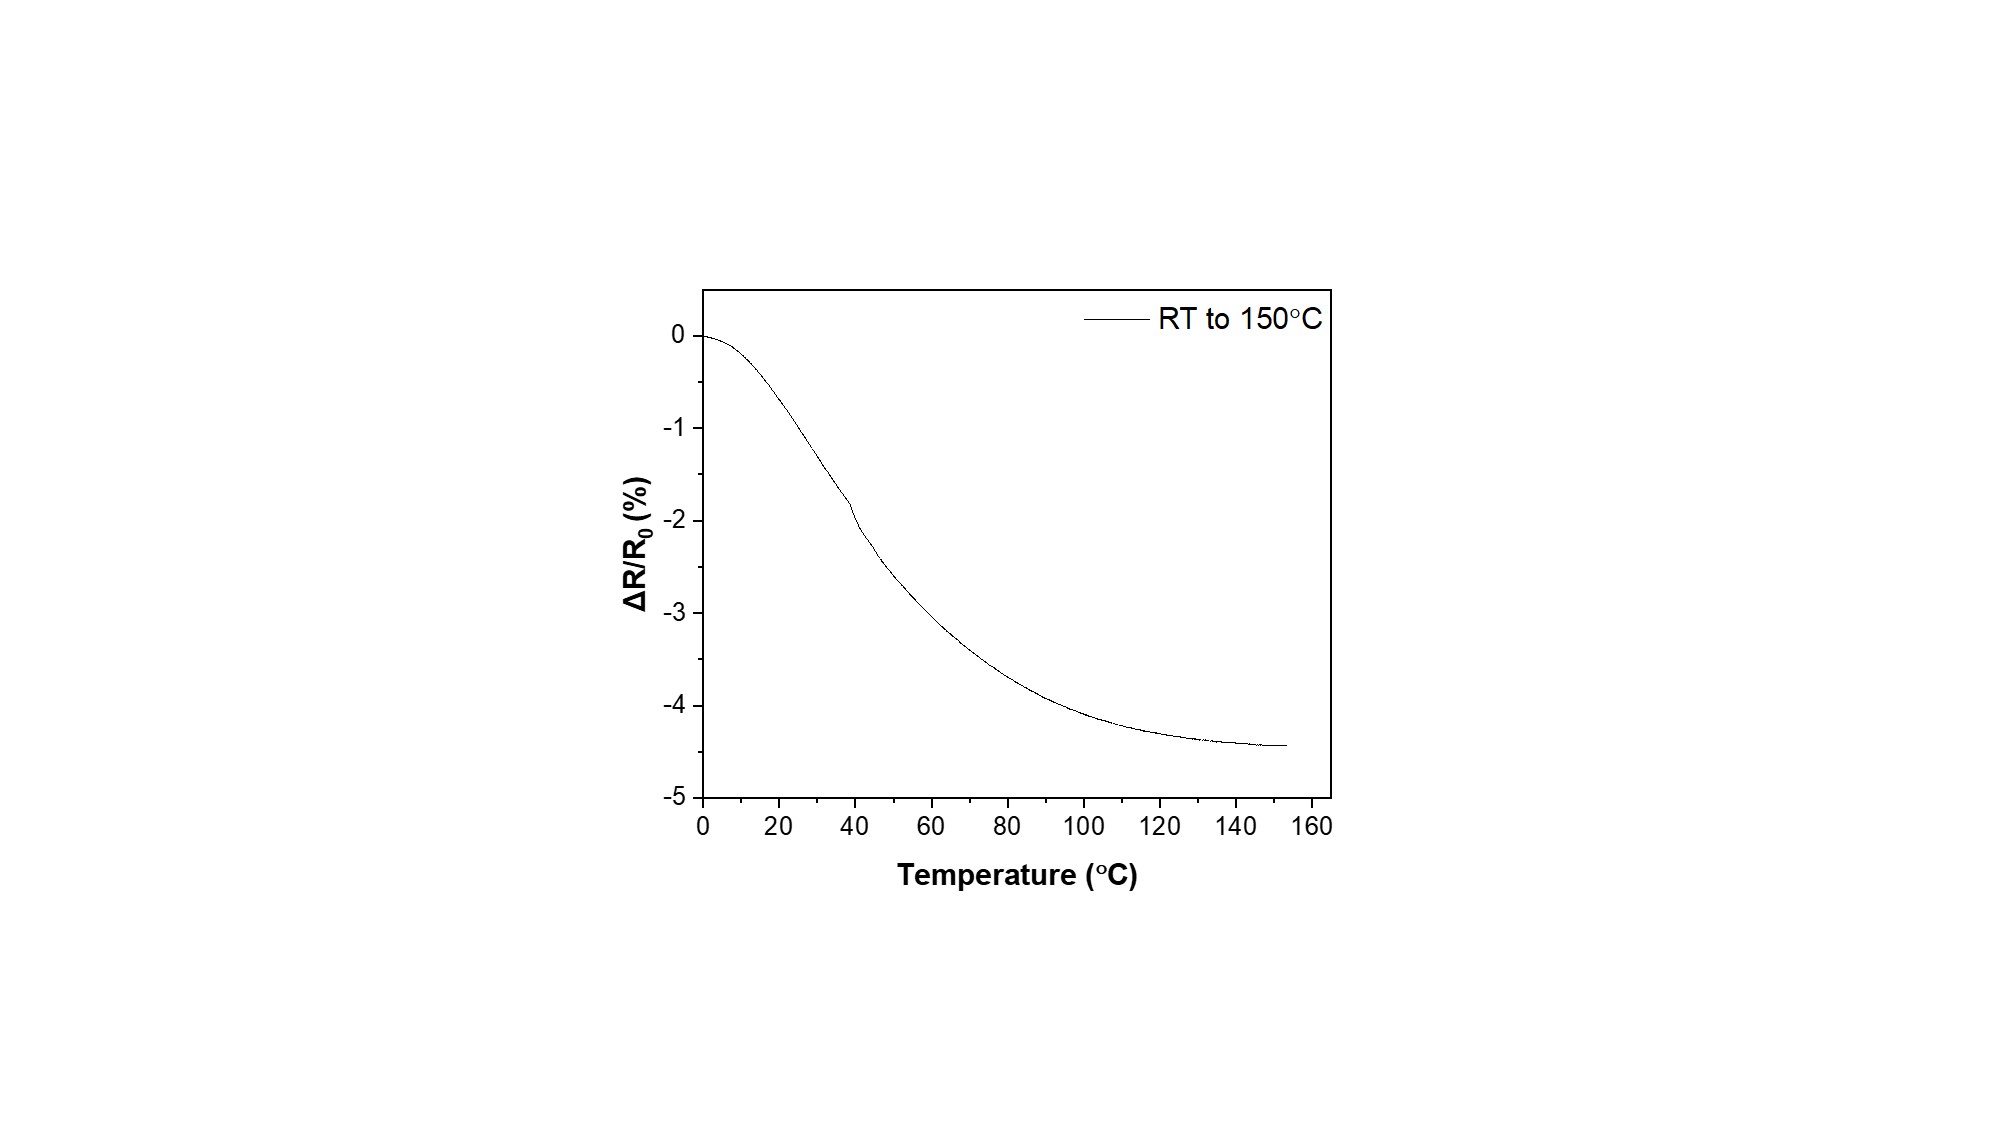
**

**Figure S4.** Electrical resistance variance of the P-LIG device at temperatures from RT to 150℃.

**
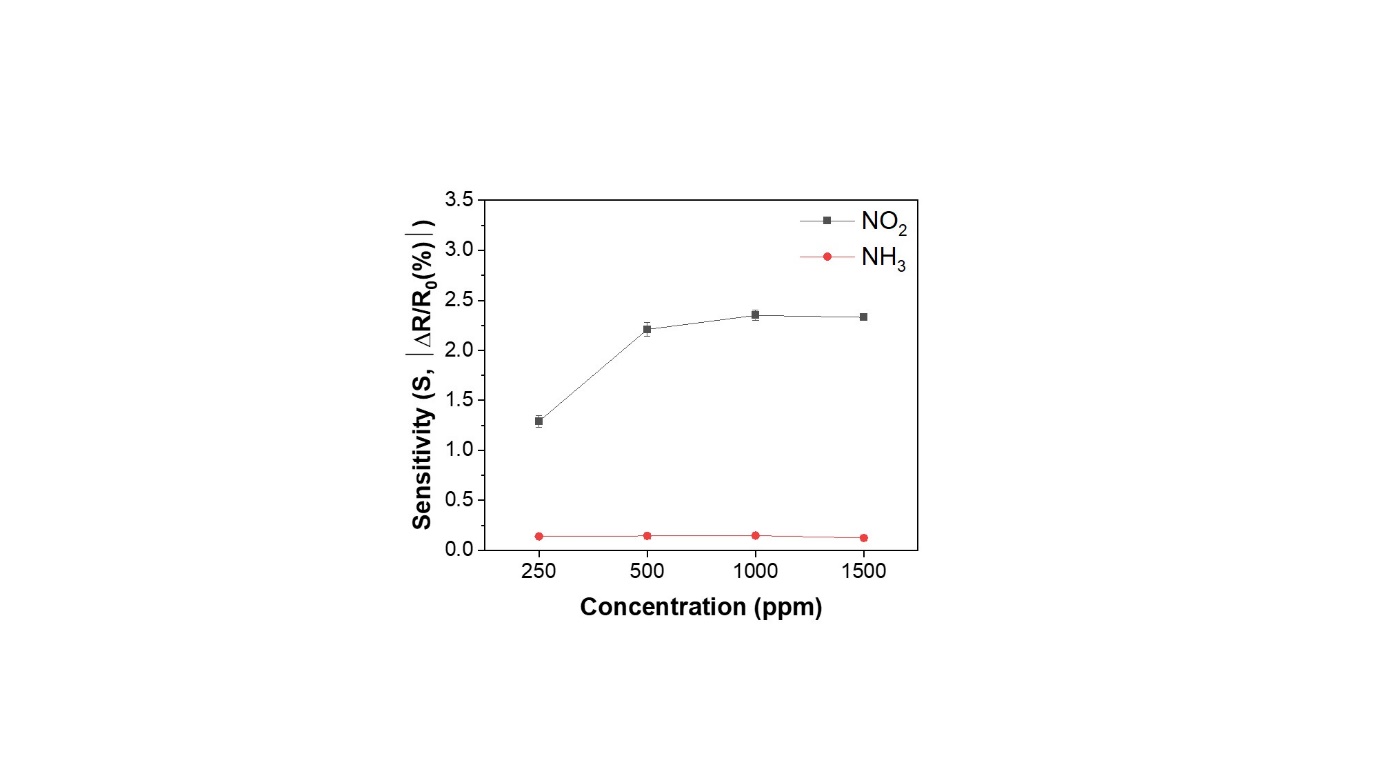
**

**Figure S5.** Comparison plot of gas responses of the P-LIG device to different concentrations of NO2 and NH3.

**
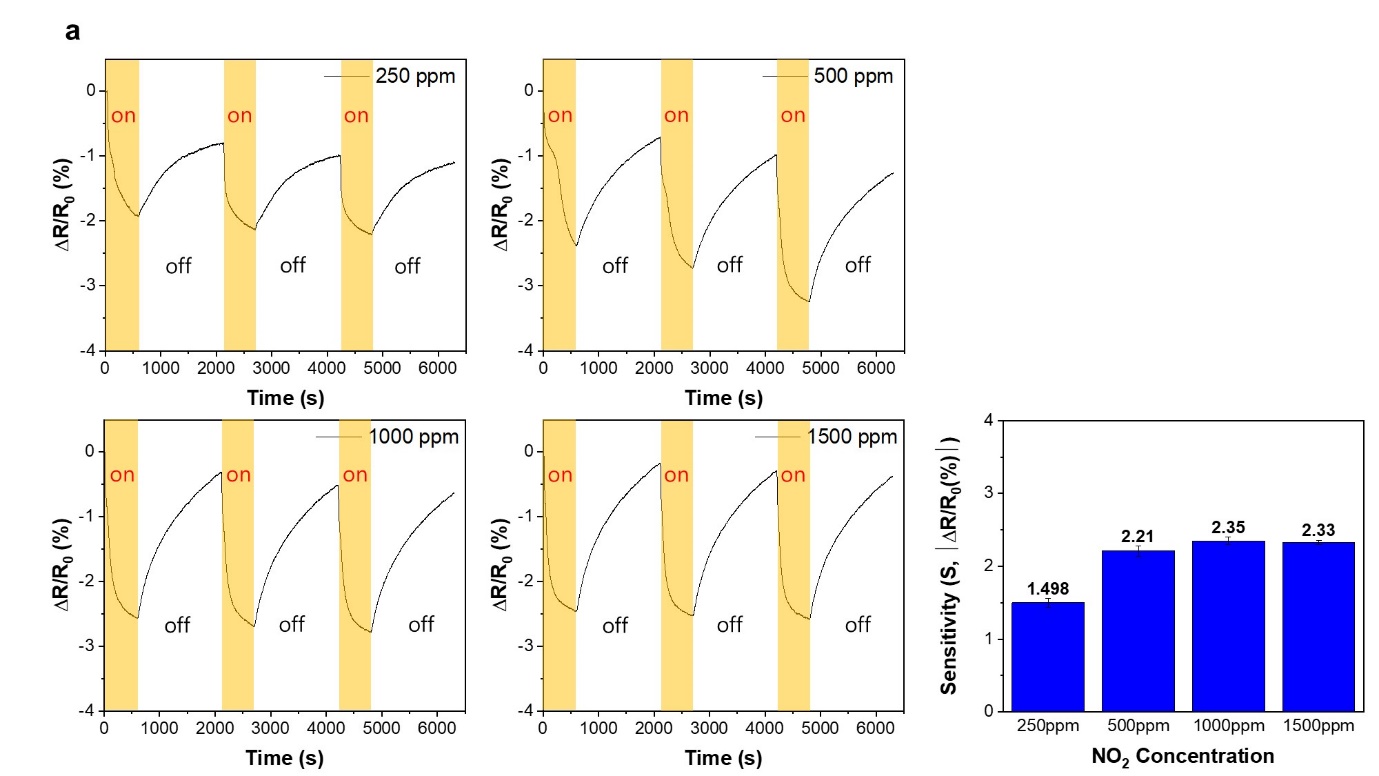
**

**
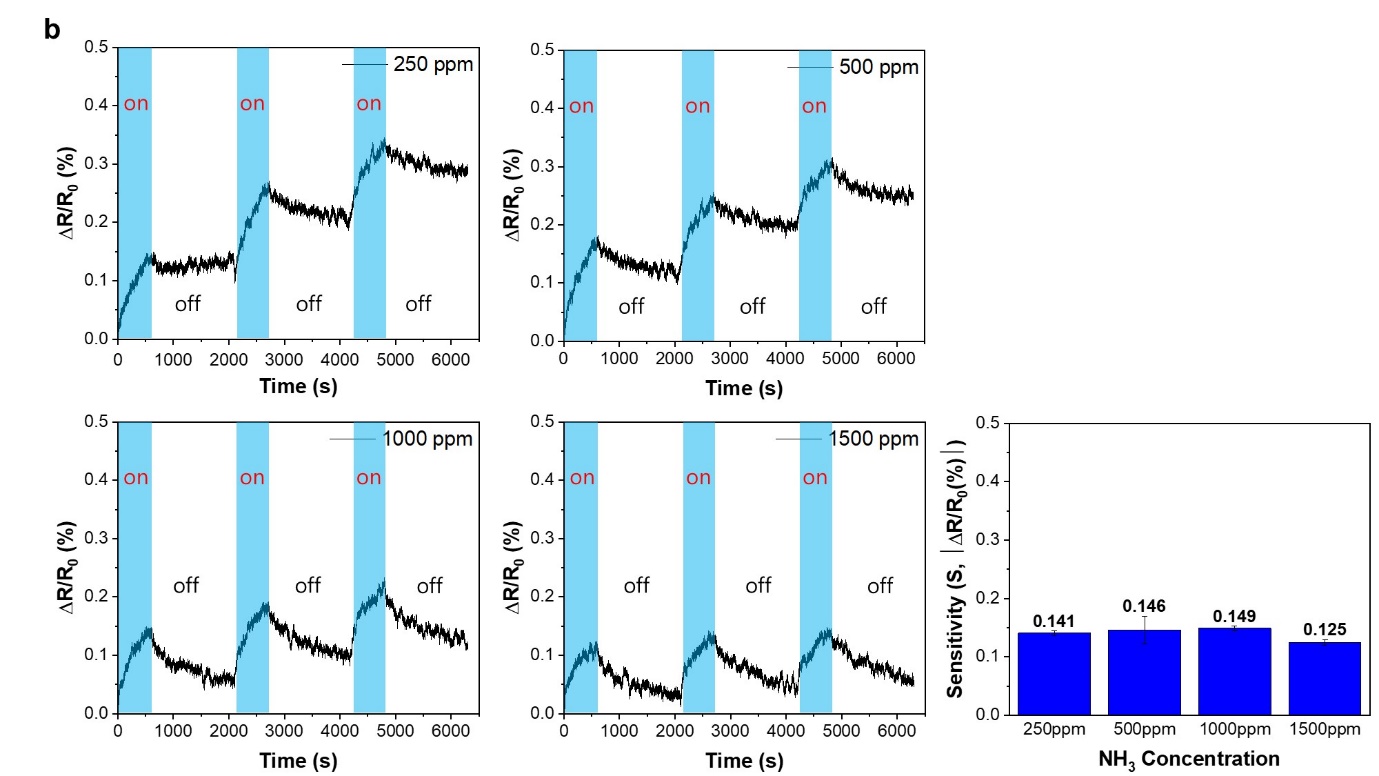
**

**Figure S6.** Gas responses of the P-LIG device to different concentrations of (a) NO2 and (b) NH3.

**
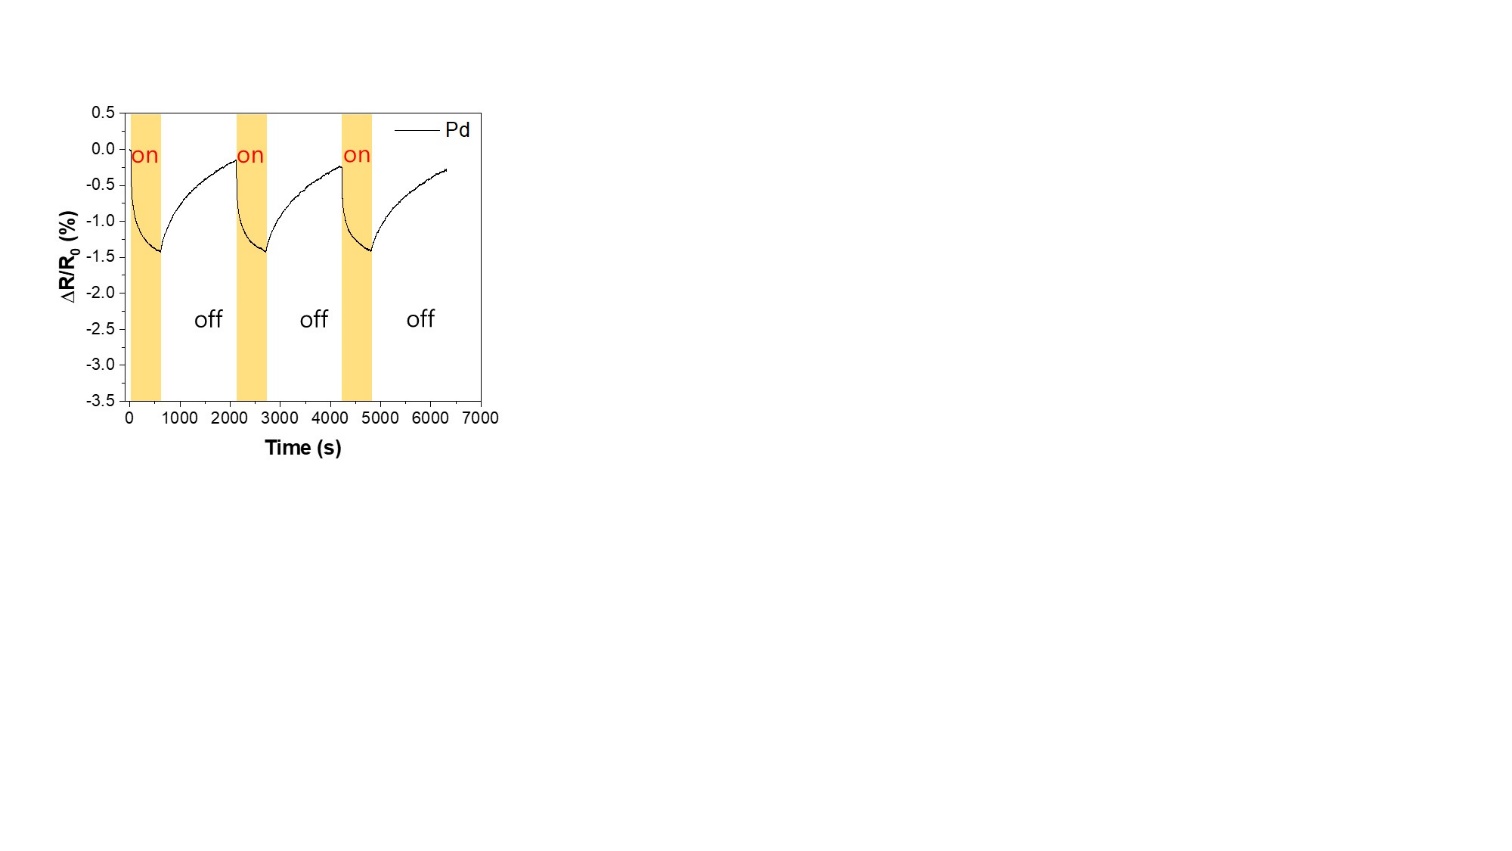

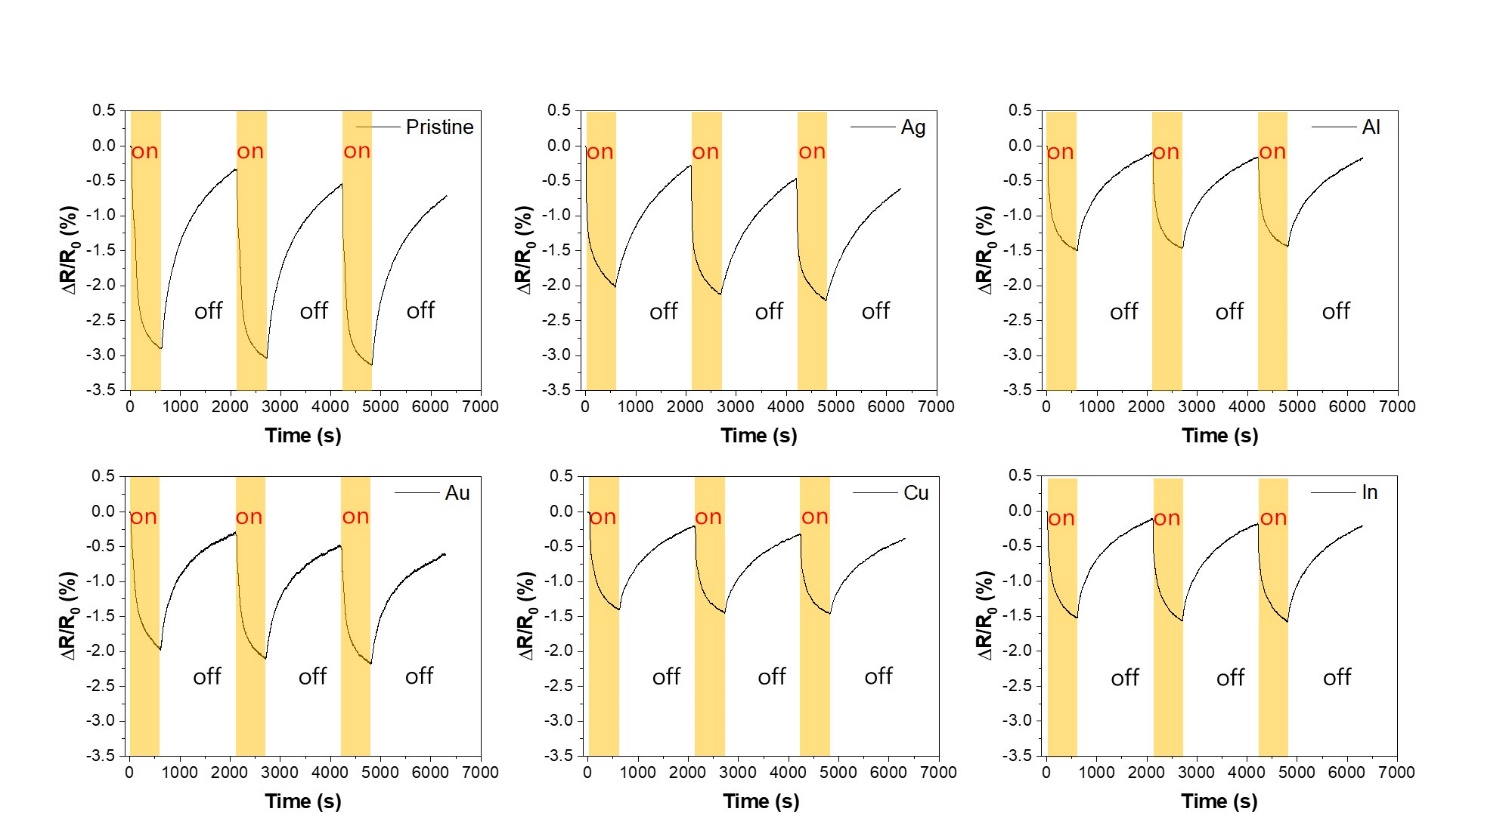
**

**Figure S7.** Gas response plots of the P- and M-LIG devices to 1000 ppm of NO2 over three on/off cycles.

**
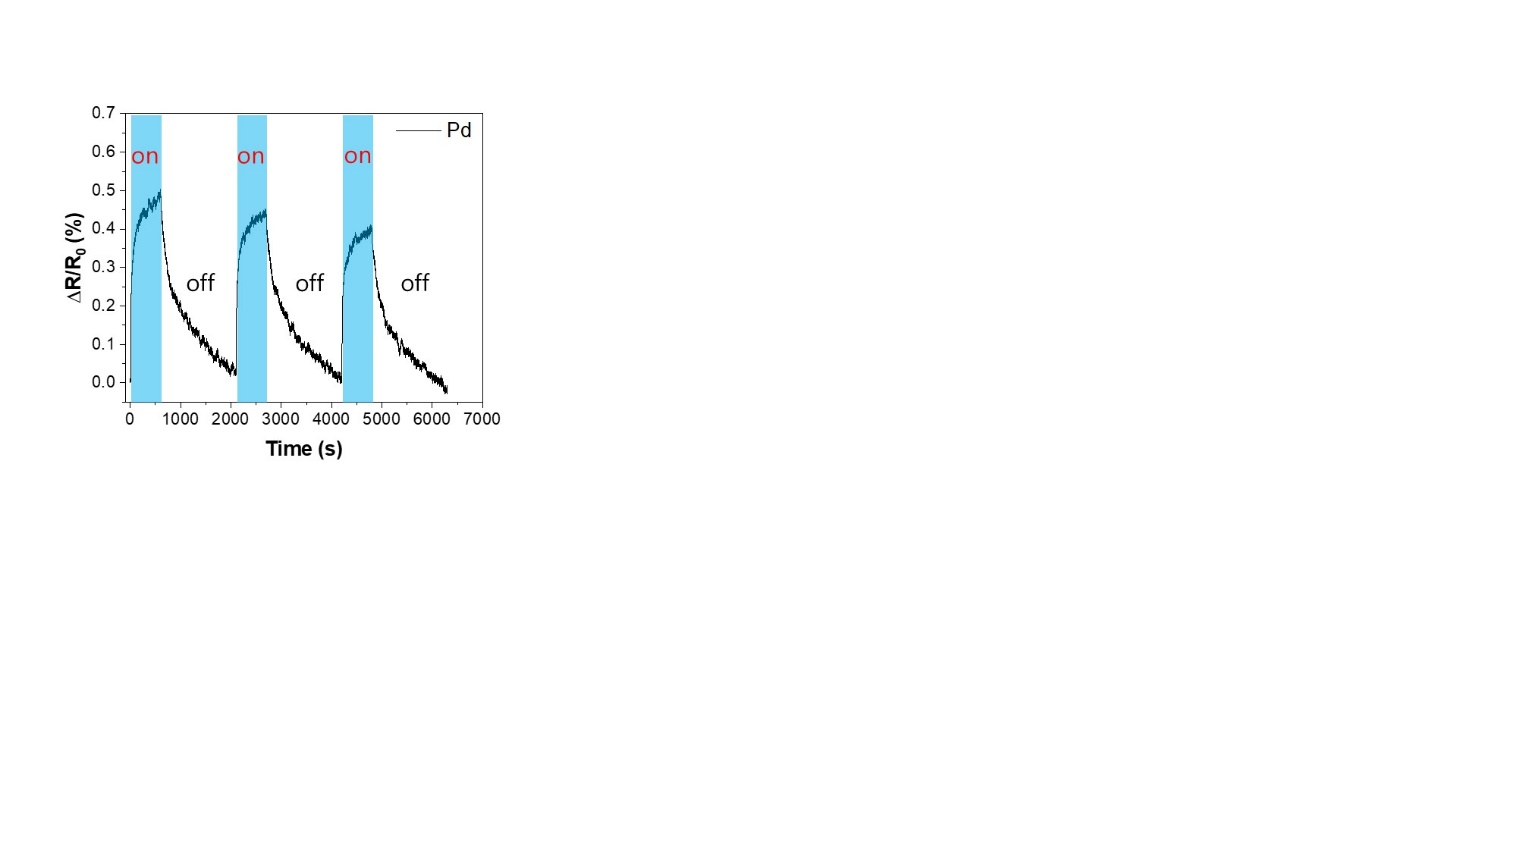

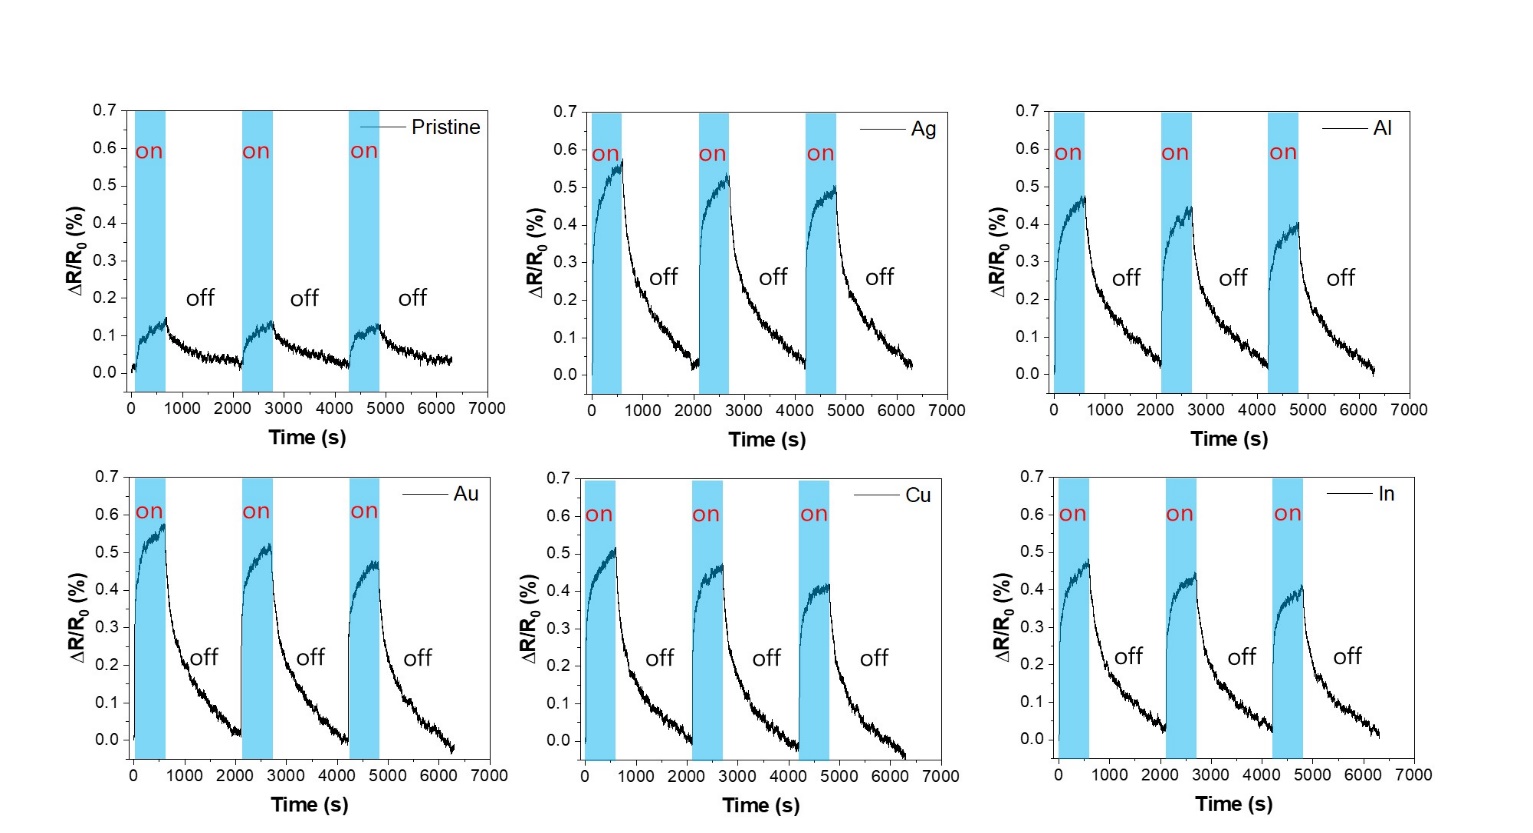
**

**Figure S8.** Gas response plots of the P- and M-LIG devices to 1000 ppm of NH3 over three on/off cycles.
